# Supplementary material
Source: Springer Nature journal article supplement (https://www.springermedizin.de/resource/supplementary/12889_2010_2857_MOESM2_ESM.pdf/9487464)
Supplement: MOESM2 [file 9487464]

## Prior to relationship

### History of abuse

History of mother beaten by partner (*neither/ his only/ hers only/ both*)

Abused in childhood\*\* (*neither/ him only/ her only/ both*)

### Education

Completed secondary education (*neither/ him only/ her only/ both*)

\*Control for woman's age

\*\*Abused in childhood refers to physical beatings for men and sexual abuse for women

## Current situation

### Demographics & relative status

Household SES

Woman's age (*15-19/ 20-34/ 35-50*)

Age gap with partner (*no gap/ her older/ him older*)

Relative educational status (*same completed level/ he has higher/ she has higher*)

Relative employment (*both working/ him working/ her working/ neither working*)

### Attitudes

Reasons for a man to hit partner (*none/ any*)

### Alcohol

Heavy drinking (*neither/ him only/ her only/ both*)

\*among cohabiting women

\*\*among married women

### Other relationships

Woman has children from more than one relationship

Partner has had concurrent relationships

### Non-partner violence

Partner violent with others in past 12 months

Woman experienced physical violence >15yrs

Woman experienced sexual violence >15yrs

### Characteristics of union

Partnership type (*married/ cohabiting/ not living together*)

Duration of relationship (*<1yr/ 1-5yrs/ >5yrs*)\*

Woman active in choosing husband\*\*

Bride price/dowry\*\*

Polygamy\*\*
